# Supplementary material for: Serum iron and risk of nonalcoholic fatty liver disease and advanced hepatic fibrosis in US adults
Source: PubMed Central journal article supplement (PMC8128903; doi:10.1038/s41598-021-89991-x), 2021-05-17

**Serum iron and risk of nonalcoholic fatty liver disease and advanced hepatic fibrosis in US adults**

Huan-Huan Yang <sup>1</sup>, Guo-Chong Chen <sup>2</sup>, De-Ming Li <sup>1</sup>, Lei Lan <sup>3</sup>, Li-Hua Chen <sup>4</sup>,  
Jia-Ying Xu <sup>5</sup>, Li-Qiang Qin <sup>\*.1</sup>

**Supplementary Figure S1. Participants Flow Chart.**

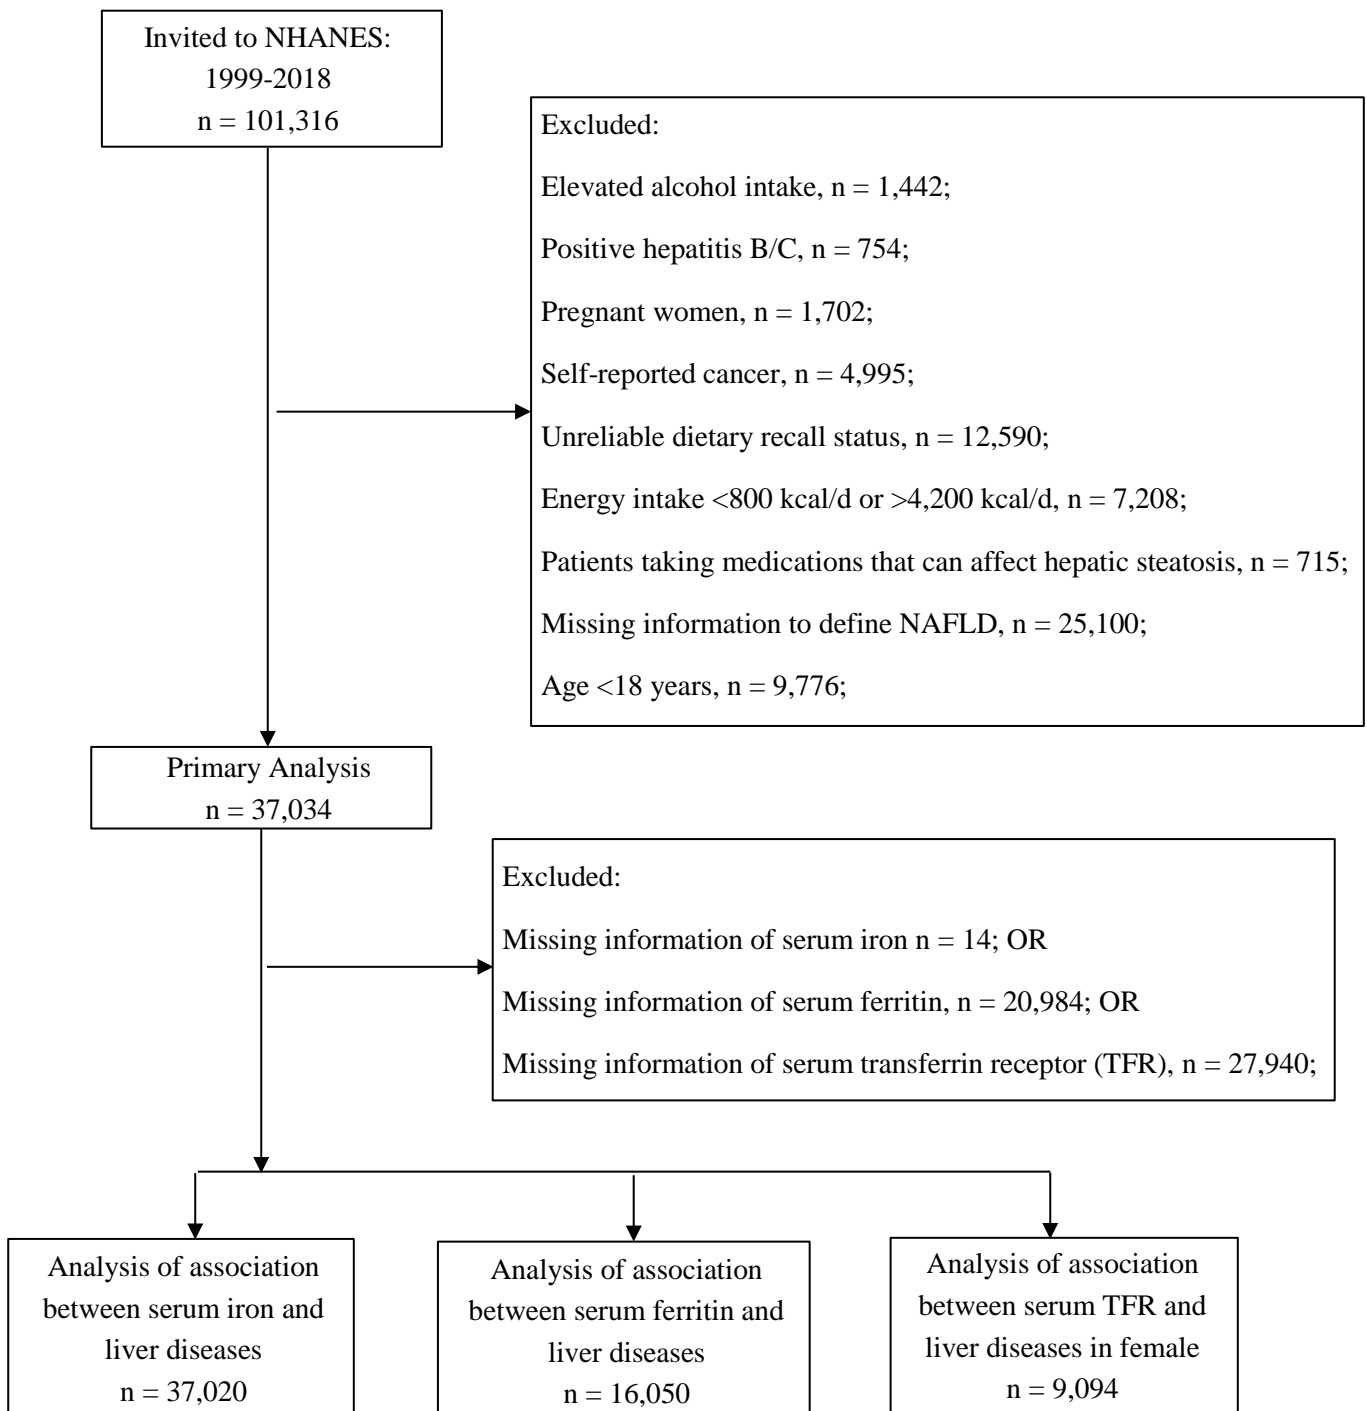

Supplement: 41598_2021_89991_MOESM1_ESM.pdf [file 41598_2021_89991_MOESM1_ESM.pdf]
