# Supplementary material for: Serum iron and risk of nonalcoholic fatty liver disease and advanced hepatic fibrosis in US adults
Source: PubMed Central journal article supplement (PMC8128903; doi:10.1038/s41598-021-89991-x), 2021-05-17
Supplement: 41598_2021_89991_MOESM2_ESM.pdf [file 41598_2021_89991_MOESM2_ESM.pdf]

**Serum iron and risk of nonalcoholic fatty liver disease and advanced hepatic fibrosis in US adults**

Huan-Huan Yang <sup>1</sup>, Guo-Chong Chen <sup>2</sup>, De-Ming Li <sup>1</sup>, Lei Lan <sup>3</sup>, Li-Hua Chen <sup>4</sup>, Jia-Ying Xu <sup>5</sup>, Li-Qiang Qin <sup>\*.1</sup>

**Supplementary Table S1.** Healthy Eating Index (HEI)-2015 components, point values, and standards for scoring.

| <b>Component [14]</b>      | <b>Standard for minimum score of zero</b> | <b>Standard for maximum score</b> | <b>Maximum points</b> |
|----------------------------|-------------------------------------------|-----------------------------------|-----------------------|
| Total fruits               | 0                                         | ≥ 0.8 cup equivalent              | 5                     |
| Whole fruits               | 0                                         | ≥ 0.4 cup equivalent              | 5                     |
| Total vegetables           | 0                                         | ≥ 1.1 cup equivalent              | 5                     |
| Greens and beans           | 0                                         | ≥ 0.2 cup equivalent              | 5                     |
| Whole grains               | 0                                         | ≥ 1.5 cup equivalent              | 10                    |
| Total dairy                | 0                                         | ≥ 1.3 cup equivalent              | 10                    |
| Total protein foods        | 0                                         | ≥ 2.5 oz equivalent               | 5                     |
| Seafood and plant proteins | 0                                         | ≥ 0.8 oz equivalent               | 5                     |
| Fatty acids                | (PUFA + MUFA) / SFA ≤ 1.2                 | (PUFA + MUFA) / SFA ≥ 2.5         | 10                    |
| Refined grains             | ≥ 4.3 oz equivalent                       | ≤ 1.8 oz equivalent               | 10                    |
| Sodium                     | ≥ 2.0 g                                   | ≤ 1.1 g                           | 10                    |
| Added sugar                | ≥ 26% of energy                           | ≤ 6.5% of energy                  | 10                    |
| Saturated fats             | ≥ 16% of energy                           | ≤ 8% of energy                    | 10                    |
| Total scores               | 0                                         |                                   | 100                   |

MUFA, monounsaturated fatty acids; PUFA, polyunsaturated fatty acids; SFA, saturated fatty acids; Each of the food groups was corrected for dietary energy 1,000 kcal.
